# Supplementary material for: Health Literacy and Health Promoting Lifestyle Profile Among Undergraduate Students in a Nigerian University: A Cross- Sectional Study
Source: Research Square preprint supplement (doi:10.21203/rs.3.rs-7602465/v1), 2025-10-23
Supplement: Supplementary file 1 [file 03f1a377102343ab92f5dc78.docx]

Supplementary Table 1: Health-Promoting Lifestyle Profile Scale

|  |  | N(%) | | | |
| --- | --- | --- | --- | --- | --- |
| s/n | Question | Never | Sometimes | Often | Routinely |
| 1 | Discuss my problems and concerns with people close to me | 43(10.7) | 261(64.9) | 85(21.1) | 13(3.2) |
| 2 | Choose a diet low in fat, saturated fat, and cholesterol | 56(13.9) | 232(57.7) | 93(23.1) | 21(5.2) |
| 3 | Report any unusual signs or symptoms to a physician or other health professional | 58(14.4) | 187(46.5) | 133(33.1) | 24(6.0) |
| 4 | Follow a planned exercise program | 110(27.4) | 179(44.5) | 87(21.6) | 26(6.5) |
| 5 | Get enough sleep | 38(9.5) | 183(45.5) | 131(32.6) | 50(12.4) |
| 6 | Feel I am growing and changing in positive ways | 30(7.5) | 133(33.1) | 169(42.0) | 70(17.4) |
| 7 | Praise other people easily for their achievements | 25(6.2) | 110(27.4) | 182(45.3) | 85(21.1) |
| 8 | Limit use of sugars and food containing sugar (sweets) | 45(11.2) | 188(46.8) | 125(31.1) | 44(10.9) |
| 9 | Read or watch TV programs about improving health | 67(16.7) | 204(50.7) | 100(24.9) | 31(7.7) |
| 10 | Exercise vigorously for 20 or more minutes at least three times a week (such as brisk walking, bicycling, aerobic dancing, using a stair climber) | 86(21.4) | 180(44.8) | 93(23.1) | 43(10.7) |
| 11 | Take some time for relaxation each day | 37(9.2) | 186(46.3) | 123(30.6) | 56(13.9) |
| 12 | Believe that my life has purpose | 31(7.7) | 90(22.4) | 143(35.6) | 138(34.3) |
| 13 | Maintain meaningful and fulfilling relationships with others | 33(8.2) | 107(26.6) | 162(40.3) | 100(24.9) |
| 14 | Eat 6-11 servings of bread, cereal, rice and pasta each day | 114(28.4) | 168(41.8) | 87(21.6) | 33(8.2) |
| 15 | Question health professionals in order to understand their instructions | 71(17.7) | 185(46.0) | 113(28.1) | 33(8.2) |
| 16 | Take part in light to moderate physical activity (such as sustained walking 30-40 minutes 5 or more times a week) | 42(10.4) | 167(41.5) | 128(31.8) | 65(16.2) |
| 17 | Accept those things in my life which I can not change | 57(14.2) | 172(42.8) | 118(29.4) | 55(13.7) |
| 18 | Look forward to the future | 29(7.2) | 105(26.1) | 135(33.6) | 133(33.1) |
| 19 | Spend time with close friends | 36(9.0) | 154(38.3) | 138(34.3) | 74(18.4) |
| 20 | Eat 2-4 servings of fruit each day | 101(25.1) | 221(55.0) | 59(14.7) | 21(5.2) |
| 21 | Get a second opinion when I question my health care provider's advice | 105(26.1) | 203(50.5) | 81(20.1) | 13(3.2) |
| 22 | Take part in leisure-time (recreational) physical activities (such as swimming, dancing, bicycling). | 95(23.6) | 201(50.0) | 79(19.7) | 27(6.7) |
| 23 | Concentrate on pleasant thoughts at bedtime | 40(10.0) | 165(41.0) | 125(31.1) | 72(17.9) |
| 24 | Feel content and at peace with myself | 28(7.0) | 151(37.6) | 133(33.1) | 90(22.4) |
| 25 | Find it easy to show concern, love and warmth to others | 31(7.7) | 120(29.9) | 160(39.8) | 91(22.6) |
| 26 | Eat 3-5 servings of vegetables each day | 100(24.9) | 210(52.2) | 70(17.4) | 22(5.5) |
| 27 | Discuss my health concerns with health professionals | 61(15.2) | 237(59.0) | 81(20.1) | 23(5.7) |
| 28 | Do stretching exercises at least 3 times per week | 100(24.9) | 194(48.3) | 85(21.1) | 23(5.7) |
| 29 | Use specific methods to control my stress | 63(15.7) | 188(46.8) | 116(28.9) | 35(8.7) |
| 30 | Work toward long-term goals in my life | 33(8.2) | 112(27.9) | 149(37.1) | 108(26.9) |
| 31 | Touch and am touched by people I care about | 38(9.5) | 136(33.8) | 153(38.1) | 75(18.7) |
| 32 | Eat 2-3 servings of milk, yogurt or cheese each day | 123(30.6) | 189(47.0) | 63(15.7) | 27(2.7) |
| 33 | Inspect my body at least monthly for physical changes/danger signs | 74(18.4) | 191(47.5) | 101(25.1) | 36(9.0) |
| 34 | Get exercise during usual daily activities (such as walking during lunch, using stairs instead of elevators, parking car away from destination and walking) | 51(12.7) | 175(43.5) | 122(30.3) | 54(13.4) |
| 35 | Balance time between work and play | 38(9.5) | 164(40.8) | 147(36.6) | 53(13.2) |
| 36 | Find each day interesting and challenging | 33(8.2) | 162(40.3) | 144(35.8) | 63(15.7) |
| 37 | Find ways to meet my needs for intimacy | 87(21.6) | 174(43.3) | 108(26.9) | 33(8.2) |
| 38 | Eat only 2-3 servings from the meat, poultry, fish, dried beans, eggs, and nuts group each day. | 70(17.4) | 207(51.5) | 93(23.1) | 32(8.0) |
| 39 | Ask for information from health professionals about how to take good care of myself. | 65(16.2) | 200(49.8) | 103(25.6) | 34(8.5) |
| 40 | Check my pulse rate when exercising | 144(35.8) | 155(38.6) | 78(19.4) | 25(6.2) |
| 41 | Practice relaxation or meditation for 15-20 minutes daily | 91(22.6) | 200(49.8) | 84(20.9) | 27(6.7) |
| 42 | I am aware of what is important to me in life | 28(7.0) | 108(26.9) | 158(39.3) | 108(26.9) |
| 43 | Get support from a network of caring people | 44(10.9) | 163(40.5) | 130(32.3) | 65(16.2) |
| 44 | Read labels to identify nutrients, fats, and sodium content in packaged food | 55(13.7) | 189(47.0) | 115(28.6) | 43(10.7) |
| 45 | Attend educational programs on personal health care | 82(20.4) | 189(47.0) | 93(23.1) | 38(9.5) |
| 46 | Reach my target heart rate when exercising | 118(29.4) | 176(43.8) | 80(19.9) | 28(7.0) |
| 47 | Pace myself to prevent tiredness | 70(17.4) | 189(47.0) | 109(27.1) | 34(8.5) |
| 48 | Feel connected with some force greater than myself | 58(14.4) | 158(39.3) | 119(29.6) | 67(16.7) |
| 49 | Settle conflicts with others through discussion and compromise | 43(10.7) | 160(39.8) | 140(34.8) | 59(14.7) |
| 50 | Eat breakfast | 52(12.9) | 184(45.8) | 95(23.6) | 71(17.7) |
| 51 | Seek guidance or counseling when necessary | 39(9.7) | 203(50.5) | 111(27.6) | 49(12.2) |
| 52 | Expose myself to new experiences and challenges | 35(8.7) | 162(40.3) | 136(33.8) | 69(17.2) |
