# Supplementary material for: Health Literacy and Health Promoting Lifestyle Profile Among Undergraduate Students in a Nigerian University: A Cross- Sectional Study
Source: Research Square preprint supplement (doi:10.21203/rs.3.rs-7602465/v1), 2025-10-23
Supplement: Supplementary file 2 [file fae06c99284551e9bf063316.docx]

Supplementary Table 2: Relationship Between Socio-demographic Characteristics and Health-promoting lifestyle practices

|  |  |  | Health Promoting Lifestyle Practices | | | | | | |
| --- | --- | --- | --- | --- | --- | --- | --- | --- | --- |
| S/N | Variable | Categories | HPLP II | Health Responsibility | Physical Activity | Nutrition | Spiritual Growth | Interpersonal Relationship | Stress Management |
| 1 | Age Group | 16 – 25 | 2.40±0.47 | 2.23±0.53 | 2.19±0.55 | 2.19±0.48 | 2.76±0.67 | 2.58±0.58 | 2.41±0.54 |
|  |  | 26 – 35 | 2.32±0.46 | 2.24±0.49 | 2.19±0.52 | 2.27±0.49 | 2.50±0.58 | 2.43±0.51 | 2.30±0.52 |
|  |  | 46 - 55 | 2.85 | 3.00 | 2.00 | 1.89 | 3.78 | 3.56 | 2.75 |
|  |  | Test Statistic | 0.838 | 1.040 | 0.057 | 0.616 | 3.609 | 2.531 | 0.793 |
|  |  | df | 2 | 2 | 2 | 2 | 2 | 2 | 2 |
|  |  | p-value | 0.433 | 0.354 | 0.944 | 0.540 | **0.028*** | 0.081 | 0.453 |
| 2 | Sex | Male | 2.39±0.47 | 2.22±0.53 | 2.23±0.54 | 2.18±0.47 | 2.72±0.68 | 2.56±0.57 | 2.41±0.53 |
|  |  | Female | 2.39 ±0.47 | 2.25±0.53 | 2.12±0.55 | 2.21±0.48 | 2.76±0.65 | 2.59±0.57 | 2.39±0.55 |
|  |  | Test Statistic | 0.227 | 0.499 | 0.001 | 0.409 | 2.307 | 0.005 | 0.106 |
|  |  | df | 400 | 400 | 400 | 400 | 400 | 400 | 400 |
|  |  | p-value | 0.946 | 0.564 | **0.037*** | 0.547 | 0.517 | 0.542 | 0.710 |
| 3 | Faculty | Administration | 2.39±0.40 | 2.28±0.49 | 2.27±0.50 | 2.31±0.48 | 2.57±0.50 | 2.48±0.42 | 2.42±0.49 |
|  |  | Arts | 2.24±0.45 | 2.10±0.57 | 2.10±0.44 | 2.22±0.37 | 2.48±0.58 | 2.31±0.66 | 2.21±0.52 |
|  |  | Clinical Sciences | 2.44±0.42 | 2.25±0.55 | 2.18±0.49 | 2.20±0.40 | 2.85±0.64 | 2.68±0.54 | 2.48±0.48 |
|  |  | Computing | 2.69±0.53 | 2.49±0.55 | 2.38±0.52 | 2.33±0.38 | 3.13±0.89 | 3.05±0.76 | 2.70±0.63 |
|  |  | Dentistry | 2.37±0.64 | 2.24±0.54 | 2.12±0.68 | 2.16±0.57 | 2.72±0.69 | 2.57±0.61 | 2.36±0.62 |
|  |  | Environmental Design & Management | 2.37±0.64 | 2.10±0.65 | 2.29±0.74 | 2.19±0.65 | 2.77±0.80 | 2.53±0.73 | 2.35±0.66 |
|  |  | Pharmacy | 2.45±0.43 | 2.33±0.49 | 2.21±0.50 | 2.16±0.57 | 2.86±0.65 | 2.65±0.55 | 2.46±0.50 |
|  |  | Technology | 2.27±0.47 | 2.09±0.51 | 2.10±0.54 | 2.18±0.50 | 2.56±0.69 | 2.41±0.58 | 2.25±0.53 |
|  |  | Test Statistic | 1.528 | 1.773 | 0.835 | 0.678 | 2.632 | 2.552 | 1.728 |
|  |  | df | 7 | 7 | 7 | 7 | 7 | 7 | 7 |
|  |  | p-value | 0.156 | 0.091 | 0.559 | 0.691 | **0.011*** | **0.014*** | 0.101 |
| 4 | Level | 100 | 2.47±0.47 | 2.31±0.55 | 2.30±0.57 | 2.27±0.51 | 2.81±0.63 | 2.62±0.52 | 2.53±0.59 |
|  |  | 200 | 2.28±0.52 | 2.13±0.52 | 2.08±0.62 | 2.05±0.53 | 2.64±0.71 | 2.45±0.64 | 2.32±0.56 |
|  |  | 300 | 2.39±0.45 | 2.24±0.51 | 2.19±0.51 | 2.23±0.47 | 2.71±0.67 | 2.56±0.56 | 2.39±0.49 |
|  |  | 400 | 2.50±0.50 | 2.37±0.56 | 2.21±0.56 | 2.20±0.50 | 2.96±0.63 | 2.74±0.66 | 2.46±0.57 |
|  |  | 500 | 2.29±0.43 | 2.10±0.51 | 2.06±0.55 | 2.09±0.47 | 2.68±0.62 | 2.54±0.56 | 2.26±0.50 |
|  |  | 600 | 2.50±0.53 | 2.42±0.69 | 2.20±0.42 | 2.40±0.40 | 2.82±1.10 | 2.60±0.76 | 2.53±0.35 |
|  |  | Test Statistic | 1.953 | 2.020 | 1.702 | 2.096 | 1.361 | 1.227 | 2.038 |
|  |  | df | 5 | 5 | 5 | 5 | 5 | 5 | 5 |
|  |  | p-value | 0.085 | 0.075 | 0.133 | 0.065 | 0.238 | 0.296 | 0.072 |
| 5 | Marital Status | Single | 2.39±0.46 | 2.23±0.53 | 2.18±0.55 | 2.19±0.48 | 2.73±0.66 | 2.57±0.57 | 2.40±0.53 |
|  |  | Married | 2.66±0.44 | 2.69±0.48 | 2.36±0.37 | 2.53±0.49 | 3.00±0.75 | 2.72±0.67 | 2.63±0.47 |
|  |  | Test Statistic | 0.460 | 0.586 | 0.858 | 0.027 | 0.343 | 0.024 | 0.366 |
|  |  | df | 400 | 400 | 400 | 400 | 400 | 400 | 400 |
|  |  | p-value | 0.153 | **0.036*** | 0.444 | 0.079 | 0.330 | 0.514 | 0.297 |
| 6 | Ethnicity | Yoruba | 2.40±0.45 | 2.24±0.53 | 2.18±0.54 | 2.20±0.46 | 2.76±0.65 | 2.59±0.56 | 2.40±0.52 |
|  |  | Igbo | 2.35±0.62 | 2.28±0.65 | 2.16±0.58 | 2.26±0.66 | 2.59±0.56 | 2.44±0.71 | 2.36±0.63 |
|  |  | Hausa | 1.94±0.09 | 1.94±0.08 | 1.94±0.08 | 2.05±0.08 | 1.94±0.08 | 1.78±0.31 | 1.94±0.09 |
|  |  | Other | 2.36±0.49 | 2.14±0.45 | 2.30±0.67 | 2.13±0.59 | 2.68±0.56 | 2.48±0.53 | 2.44±0.60 |
|  |  | Test Statistic | 0.756 | 0.489 | 0.429 | 0.304 | 1.516 | 1.976 | 0.592 |
|  |  | df | 3 | 3 | 3 | 3 | 3 | 3 | 3 |
|  |  | p-value | 0.529 | 0.692 | 0.732 | 0.823 | 0.210 | 0.117 | 0.620 |
| 7 | Religion | Christianity | 2.38±0.45 | 2.22±0.52 | 2.16±0.53 | 2.18±0.47 | 2.73±0.65 | 2.56±0.56 | 2.39±0.52 |
|  |  | Islam | 2.50±0.55 | 2.34±0.61 | 2.34±0.66 | 2.33±0.50 | 2.81±0.76 | 2.66±0.64 | 2.49±0.62 |
|  |  | Traditional | 1.87 | 1.89 | 1.88 | 2.11 | 1.89 | 1.56 | 1.88 |
|  |  | Other | 2.45±0.52 | 2.61±0.55 | 2.38±0.35 | 2.44±0.47 | 2.39±0.55 | 2.55±0.63 | 2.25±0.53 |
|  |  | Test Statistic | 1.425 | 1.29 | 1.719 | 1.700 | 0.936 | 1.454 | 0.963 |
|  |  | df | 3 | 3 | 3 | 3 | 3 | 3 | 3 |
|  |  | p-value | 0.235 | 0.276 | 0.162 | 0.167 | 0.423 | 0.227 | 0.410 |
| 8 | Living Situation | On-Campus | 2.42±0.45 | 2.28±0.54 | 2.16±0.55 | 2.21±0.47 | 2.79±0.63 | 2.64±0.53 | 2.42±0.50 |
|  |  | Off-Campus | 2.36±0.49 | 2.20±0.52 | 2.19±0.56 | 2.18±0.49 | 2.71±0.70 | 2.52±0.61 | 2.38±0.56 |
|  |  | With Parent/Guardian | 2.44±0.33 | 2.35±0.44 | 2.42±0.29 | 2.36±0.44 | 2.59±0.41 | 2.45±0.42 | 2.49±0.36 |
|  |  | Test Statistic | 0.771 | 1.350 | 0.967 | 0.697 | 0.921 | 2.552 | 0.405 |
|  |  | df | 2 | 2 | 2 | 2 | 2 | 2 | 2 |
|  |  | p-value | 0.463 | 0.260 | 0.381 | 0499 | 0.399 | 0.079 | 0.667 |
| 9 | Income Source | Self-Sponsored | 2.36±0.52 | 2.25±0.57 | 2.27±0.54 | 2.29±0.53 | 2.56±0.77 | 2.44±0.63 | 2.34±0.63 |
|  |  | Parent/Guardian | 2.40±0.46 | 2.23±0.53 | 2.17±0.55 | 2.18±0.47 | 2.77±0.65 | 2.59±0.56 | 2.41±0.53 |
|  |  | Scholarship | 2.42±0.44 | 2.29±0.26 | 2.43±0.53 | 2.380.37 | 2.65±0.73 | 2.53±0.68 | 2.23±0.43 |
|  |  | Test Statistic | 0.130 | 0.060 | 1.205 | 1.510 | 2.112 | 1.461 | 0.706 |
|  |  | df | 2 | 2 | 2 | 2 | 2 | 2 | 2 |
|  |  | p-value | 0.878 | 0.942 | 0.301 | 0.222 | 0.122 | 0.233 | 0.494 |
| 10 | Parents’ Highest Education Level | No formal education | 2.35±0.37 | 2.28±0.44 | 2.23±0.34 | 2.40±0.45 | 2.50±0.57 | 2.43±0.50 | 2.24±0.43 |
|  |  | Primary education | 2.02±0.72 | 2.06±0.80 | 2.03±0.74 | 2.00±0.68 | 1.94±0.69 | 2.08±0.71 | 2.00±0.71 |
|  |  | Secondary education | 2.48±0.46 | 2.35±0.49 | 2.24±0.58 | 2.32±0.49 | 2.82±0.64 | 2.63±0.56 | 2.50±0.52 |
|  |  | Tertiary education | 2.36±0.48 | 2.20±0.55 | 2.17±0.54 | 2.17±0.48 | 2.71±0.68 | 2.54±0.59 | 2.37±0.54 |
|  |  | Postgraduate education | 2.40±0.43 | 2.24±0.52 | 2.17±0.55 | 2.15±0.45 | 2.80±0.64 | 2.62±0.53 | 2.42±0.50 |
|  |  | Test Statistic | 1.588 | 1.312 | 0.332 | 2.404 | 2.302 | 1.381 | 1.695 |
|  |  | df | 4 | 4 | 4 | 4 | 4 | 4 | 4 |
|  |  | p-value | 0.177 | 0.265 | 0.857 | **0.049*** | 0.056 | 0.240 | 0.150 |
| 11 | Monthly Allowance | Less than ₦5,000 | 2.30±0.55 | 2.17±0.71 | 2.25±0.54 | 2.23±0.60 | 2.47±0.58 | 2.35±0.50 | 2.35±0.68 |
|  |  | ₦5,000 – ₦9,999 | 2.46±0.42 | 2.34±0.47 | 2.33±0.49 | 2.24±0.43 | 2.76±0.60 | 2.61±0.51 | 2.44±0.48 |
|  |  | ₦10,000 – ₦19,999 | 2.35±0.46 | 2.17±0.54 | 2.09±0.59 | 2.12±0.46 | 2.73±0.62 | 2.56±0.56 | 2.39±0.53 |
|  |  | ₦20,000 – ₦29,999 | 2.39±0.44 | 2.23±0.50 | 2.19±0.51 | 2.17±0.43 | 2.73±0.68 | 2.57±0.56 | 2.42±0.52 |
|  |  | ₦30,000 – ₦49,999 | 2.41±0.45 | 2.26±0.53 | 2.14±0.54 | 2.21±0.48 | 2.81±0.67 | 2.62±0.56 | 2.40±0.53 |
|  |  | ₦50,000 – ₦99,999 | 2.38±0.50 | 2.24±0.54 | 2.16±0.56 | 2.19±0.53 | 2.75±0.71 | 2.57±0.61 | 2.38±0.56 |
|  |  | ₦100,000 and above | 2.40±0.53 | 2.20±0.57 | 2.29±0.61 | 2.26±0.50 | 2.68±0.72 | 2.53±0.67 | 2.39±0.57 |
|  |  | Test Statistic | 0.360 | 0.536 | 1.196 | 0.483 | 0.654 | 0.595 | 0.110 |
|  |  | df | 6 | 6 | 6 | 6 | 6 | 6 | 6 |
|  |  | p-value | 0.904 | 0.781 | 0.3 | 0.821 | 0.687 | 0.734 | 0.995 |
